# Supplementary material for: Comparative Sequence Analysis of TRI1 of Fusarium
Source: MDPI journal article supplement (doi:10.3390/toxins11120689), 2019-11-23
Supplement: s1 [file s1]

# Supplementary Materials: Comparative Sequence Analysis of TRI1 of Fusarium

Amanda C. Ramdass, Ria T. Villafana and Sephra N. Rampersad

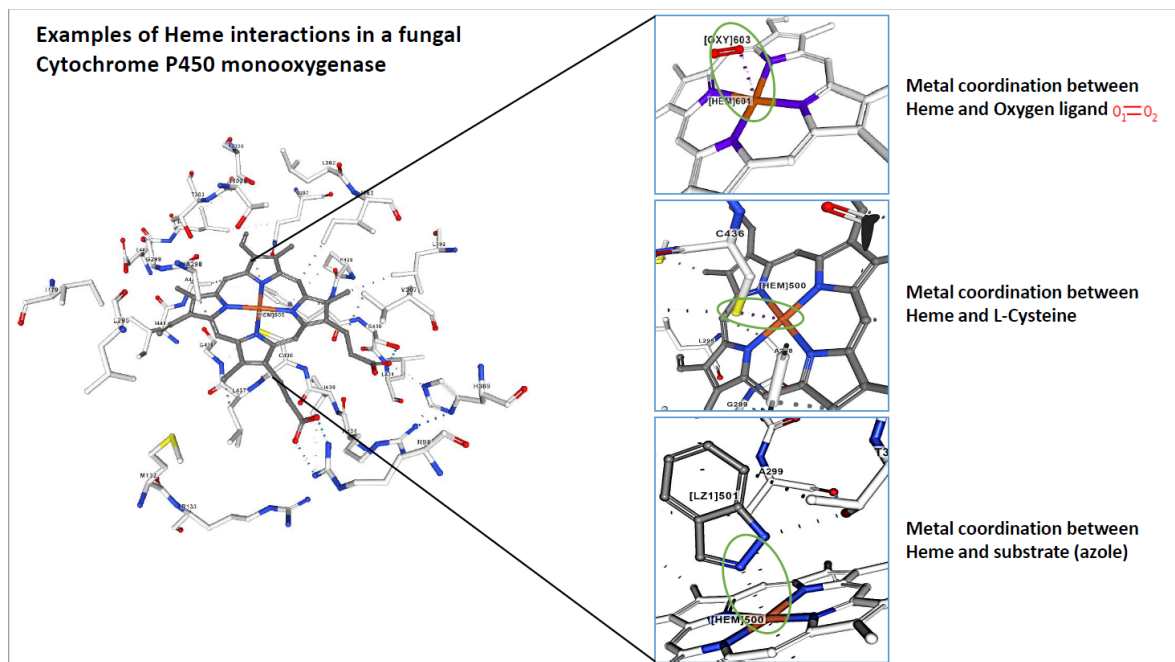

Figure S1. Examples of heme interactions in a fungal cytochrome P450 monooxygenase.

Example of ligand binding relative to heme moiety  
 PDB code: 3E61  
 Partial 3D structure: Cytochrome P450 bound to Indazole substrate

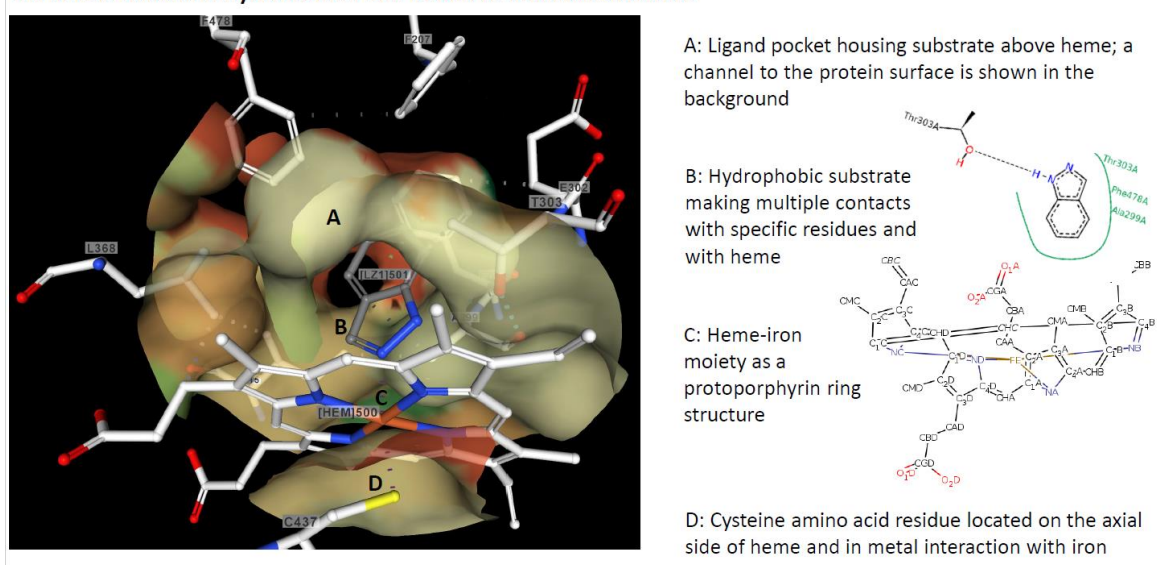

Figure S2. Example of substrate/ligand binding relative to heme moiety.
